# Supplementary material for: Microtubule rescue at midzone edges promotes overlap stability and prevents spindle collapse during anaphase B
Source: eLife. 2022 Mar 16;11:e72630. doi: 10.7554/eLife.72630 (PMC9018073; doi:10.7554/eLife.72630)
Supplement: Supplementary file 1. [file elife-72630-supp1.xlsx]

## Sheet: Strains
Strains used in figures
Designation	Identifier	Genotype	Source	Figures
wt	TP5567	h- alp7-3xGFP:kanMX6 leu1:sid4-GFP leu1-32 ura4-D18	This study	1, 1-S1, 1-S2, 2, 2-S1, 5, 5-S1, 6, 6-S1
wt	TP3288	h- cls1-3xGFP:kanMX6 mCherry-atb2:hphMX6 leu1-32 ura4-D18	Lab collection	1, 1-S1, 2-S1, 6, 6-S1
wt	TP5986	h+ kanMX6:P1nmt1-GFP-mal3 leu1:sid4-GFP	This study	1-S2
mal3Δ	TP5624	h- alp7-3xGFP:kanMX6 leu1:sid4-GFP mal3Δ:hphMX6 leu1-32 ura4-D18	This study	2
klp9Δ	TP5574	h+ alp7-3xGFP:kanMX6 leu1:sid4-GFP klp9Δ:natMX6 leu1-32 ura4-D18	This study	2
clp1Δ	TP5668	h- alp7-3xGFP:kanMX6 leu1:sid4-GFP clp1Δ:natMX6 leu1-32 ura4-D18	This study	2
klp5Δklp6Δ	TP5672	h+ alp7-3xGFP:kanMX6 leu1:sid4-GFP klp5Δ:Ura Klp6Δ:Hph leu1-32 ura4-D18	This study	2
dis1Δ	TP5670	h+ alp7-3xGFP:kanMX6 leu1:sid4-GFP Dis1Δ:hphMX6 leu1-32 ura4-D18	This study	2-S1
cls1OE	TP5625	h- alp7-3xGFP:kanMX6 leu1:sid4-GFP natMX6:P1nmt1-cls1 leu1-32 ura4-D18	This study	2, 2-S1
cls1off	TP5572	h+ alp7-3xGFP:kanMX6 leu1:sid4-GFP natMX6:P81nmt1-cls1 leu1-32 ura4-D18	This study	2-S1
cls1-3xGFPOE	TP5499	h- natMX6:P1nmt1-cls1-3xGFP:kanMX6 mcherry-atb2:hphMX6 leu1-32 ura4-D18 ade6-	This study	2-S1
cls1-3xGFPoff	TP5337	h- natMX6:P81nmt1-cls1-3xGFP:kanMX6 mCherry-atb2:hphMX6 leu1-32 ura4-D18 ade6-	This study	2-S1
wt/ctrl/cerulenin	TP5662	h+ alp7-3xGFP:kanMX6 leu1:sid4-GFP cut11-mCherry:hphMX6 leu1-32	This study	3, 3-S1, 4,4-S1,5,5-S1
cdc25-22	TP5663	h+ alp7-3xGFP:kanMX6 leu1:sid4-GFP cut11-mCherry:hph cdc25-22 leu1-32 ura4-D18	This study	3, 3-S1
klp9OE	TP5665	h+ alp7-3xGFP:kanMX6 leu1:sid4-GFP cut11-mCherry:hph natMX6:P1nmt1-klp9 leu1-32 ura4-D18	This study	3, 3-S1
wt	TP5717	h+ alp7-3xGFP:kanMX6 leu1:sid4-GFP cut11-mCherry:natMX6 leu1-32 ura4-D18	This study	4, 4-S1
ark1-as3	TP5761	h+ alp7-3xGFP:kanMX6 leu1:sid4-GFP cut11-mCherry:natMX6 ark1-as3:hphMX6 leu1-32 ura4-D18	This study	4, 4-S1
ase1Δ	TP5577	h- alp7-3xGFP:kanMX6 leu1:sid4-GFP ase1Δ:natMX6 leu1-32 ura4-D18	This study	5, 5-S1, 6, 6-S1
ase1off	TP5570	h+ alp7-3xGFP:kanMX6 leu1:sid4-GFP natMX6:P81nmt1-Ase1 leu1-32 ura4-D18	This study	5-S1
mcherry-ase1OE	TP5772	h- alp7-3xGFP:natMX6 leu1:sid4-GFP kanMX6:P1nmt1-mCherry-ase1 leu1-32 ura4-D18	This study	5-S1
wt	TP5842	h- alp7-3xGFP:natMX6 leu1:sid4-GFP mCherry-ase1::kanMX6 leu1-32 ura4-D18	This study	5-S1
ase1Δ	TP5836	h- alp7-3xGFP:kanMX6 leu1:sid4-GFP cut11-mCherry:hph ase1Δ:natMX6 leu1-32 ura-D18	This study	5
imp1Δ	TP5981	h+ alp7-3xGFP:kanMX6 leu1:sid4-GFP cut11-mCherry:hph imp1Δ:ura4 leu1-32 ura-D18	This study	figure in Response Letter
les1Δ	TP5982	h+ alp7-3xGFP:kanMX6 leu1:sid4-GFP cut11-mCherry:natR les1Δ:Hph leu1-32 ura4-D18	This study	4-S2
nem1Δ	TP5723	h+ alp7-3xGFP:kanMX6 leu1:sid4-GFP cut11-mCherry:hph nem1Δ:NatMx6 leu1-32	This study	4-S2
Strains used to generate new alleles (see Alleles tab)
	Identifier	Genotype	Source
	AP240	h- ade6-M210 ura4-D18 leu1-32	Lab collection
	AP241	h+ ade6-M210 ura4-D18 leu1-32	Lab collection
	TP3288	h- cls1-3xGFP:kanMX6 mCherry-atb2:hphMX6	Lab collection
	TP3114	h- cls1-3xGFP:kanMX6 leu1-32 ura4-D18 ade6-	Lab collection
	TP1222	h+ leu1-32 ura4-D18 ase1Δ:natMX6	Lab collection

## Sheet: Alleles
Allele name	Generation method
natMX6:P81nmt1-cls1-3xGFP:kanMX6	TP3288 was transformed with the PCR product of pSR176 (pFA6a-natMX6-Pnmt81), using oligos SR6.78 and SR6.79
natMX6:Pnmt1-cls1-3xGFP:kanMX6	TP3114 was transformed with the PCR product of pSR174 (pFA6a-natMX6-P1nmt1), using oligos SR6.78 and SR6.79
kanMX6:P1nmt1-mCherry-ase1	AP241 was transformed with the PCR product of pKS394 (pFa6a-kanMX6-P1nmt1-mCherry), using oligos ML39 and SR5.57
kanMX6:P41nmt1-mCherry-ase1	AP241 was transformed with the PCR product of pKS395 (pFa6a-kanMX6-P41nmt1-mCherry), using oligos ML39 and SR5.57
mCherry-ase1:kanMX6	TP1222 was transformed with PCR product of pML1 (pFa6a-mCherry-ase1:kanMX6) with primers ML42 and SR5.56 .
nem1Δ:NatMx6	AP240 was transformed with the PCR product of pFa6a-NatMX6, using oligos ML31 and ML32

## Sheet: Plasmids
Plasmid name	Source
pSR176 (pFA6a-natMX6-Pnmt81)	Lab collection, Addgene plasmid #39280 where the kanMX6 is substituted by natMX6
pSR174 (pFA6a-natMX6-P1nmt1)	Lab collection, Addgene plasmid #39282 where the kanMX6 is substituted by natMX6
pKS394 (pFa6a-kanMX6-P1nmt1-mCherry)	Ken Sawin's lab
pKS395 (pFa6a-kanMX6-P41nmt1-mCherry)	Ken Sawin's lab
pML1 (pFa6a-mCherry-ase1:kanMX6)	mCherry-ase1 was amplified from strain TP5771 with primers ML40 and ML41. The PCR product was digested with AscI and SalI and ligated with the plasmid pFA6a-mEGFP-KanMX6 (Addgene #87023), digested with the same enzymes, to replace meGFP with mCherry-ase1. The plasmid map is provided as Supplementary File 2

## Sheet: Oligonucleotides
ID	Sequence
SR6.78	GCGAGTTTTTAATATTCTCTTCGCAAACAACGCTTCACGTTTCTCTTGTTTCGCTCGTTTCATCAATATATTTGTAATTGGAATTCGAGCTCGTTTAAAC
SR6.79	TCAGTATATAGATGAAAGCTTTAGAATTTCATACCATTACTTTTAAGGAACTTTAAAAAATCTTGCGCATCCTTATCCGCCATGATTTAACAAAGCGACTATA
SR5.56	CTTTTATGAATTATCTATATGCTGTATTCATATGCAAAAATATGTATATTTAAATTTGATCGATTAGGTAAATAAGAAGCGAATTCGAGCTCGTTTAAAC
SR5.57	AGTTTTCATATCTTCCTTTATATTCTATTAATTGAATTTCAAACATCGTTTTATTGAGCTCATTTACATCAACCGGTTCAGAATTCGAGCTCGTTTAAAC
ML31	CGTTGTATACTTTGTATGCATCGCTTCTTTTGGTGAATTTTTTAATTCTTTGCAATCGCAGCAGAGAGAAAATAATTGTACGGATCCCCGGGTTAATTAA
ML32	AAGTTATTTTAGACCATCGTTACTGGTGATAAATAACGAGTAAATTACTCACGAAAAAAAAAAGGAATCATGAAAAGCACGAATTCGAGCTCGTTTAAAC
ML39	TTAGATTCATTATTAGAGTGATTATCTTTTTCAGCAATAGAATCAGTGCTTTGAATGTCATCCATCATTACTGTTTGCATCTTGTACAGCTCGTCCATGC
ML40	TAAGCAGTCGACatggtgagcaagggcgag
ML41	TAAGCAGGCGCGCCttaaaagccttcttctccccattca
ML42	AGTTTTCATATCTTCCTTTATATTCTATTAATTGAATTTCAAACATCGTTTTATTGAGCTCATTTACATCAACCGGTTCAatggtgagcaagggcgag
