# Supplementary figures and images for: Microtubule rescue at midzone edges promotes overlap stability and prevents spindle collapse during anaphase B
Source: eLife journal article supplement (doi:10.7554/elife.72630), 2022-03-16

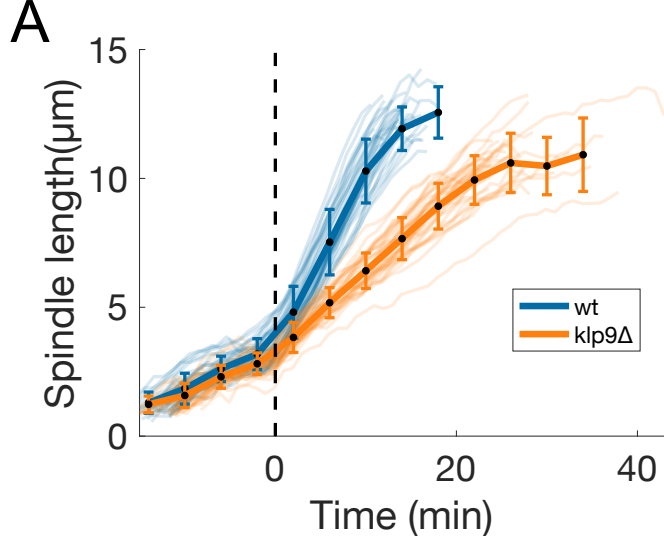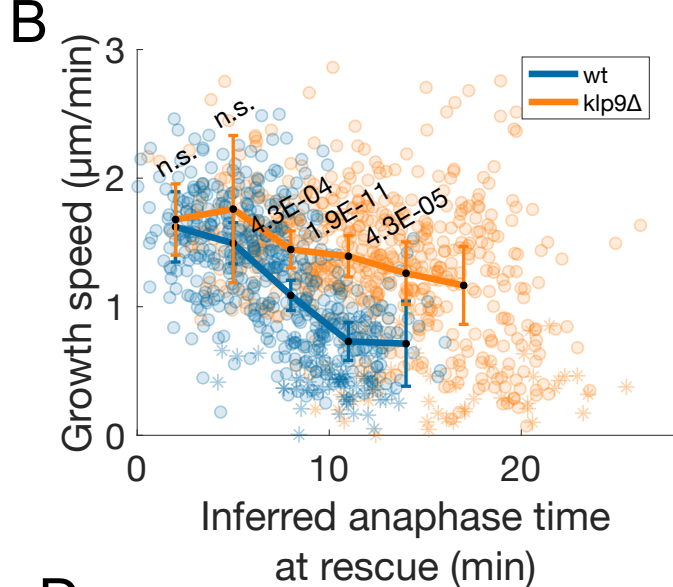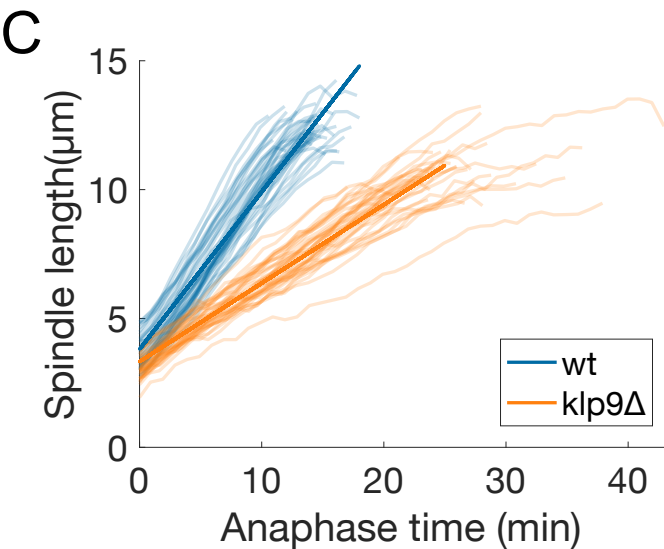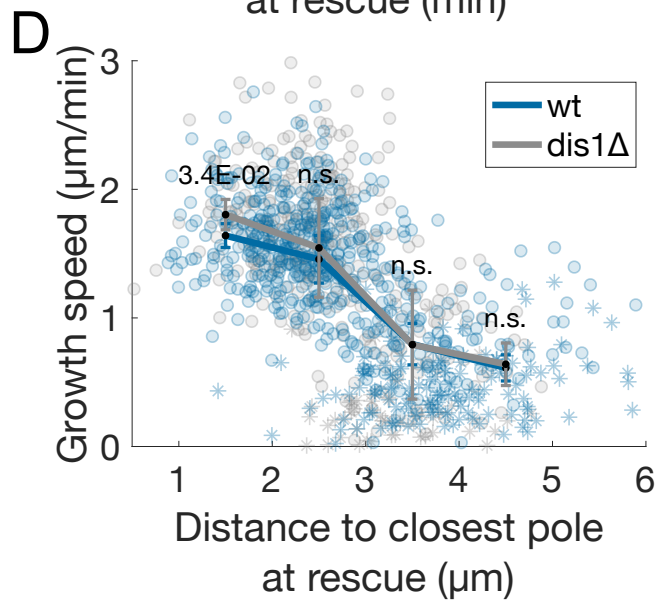

Supplement: supp [file elife-72630-supp-v1.zip]

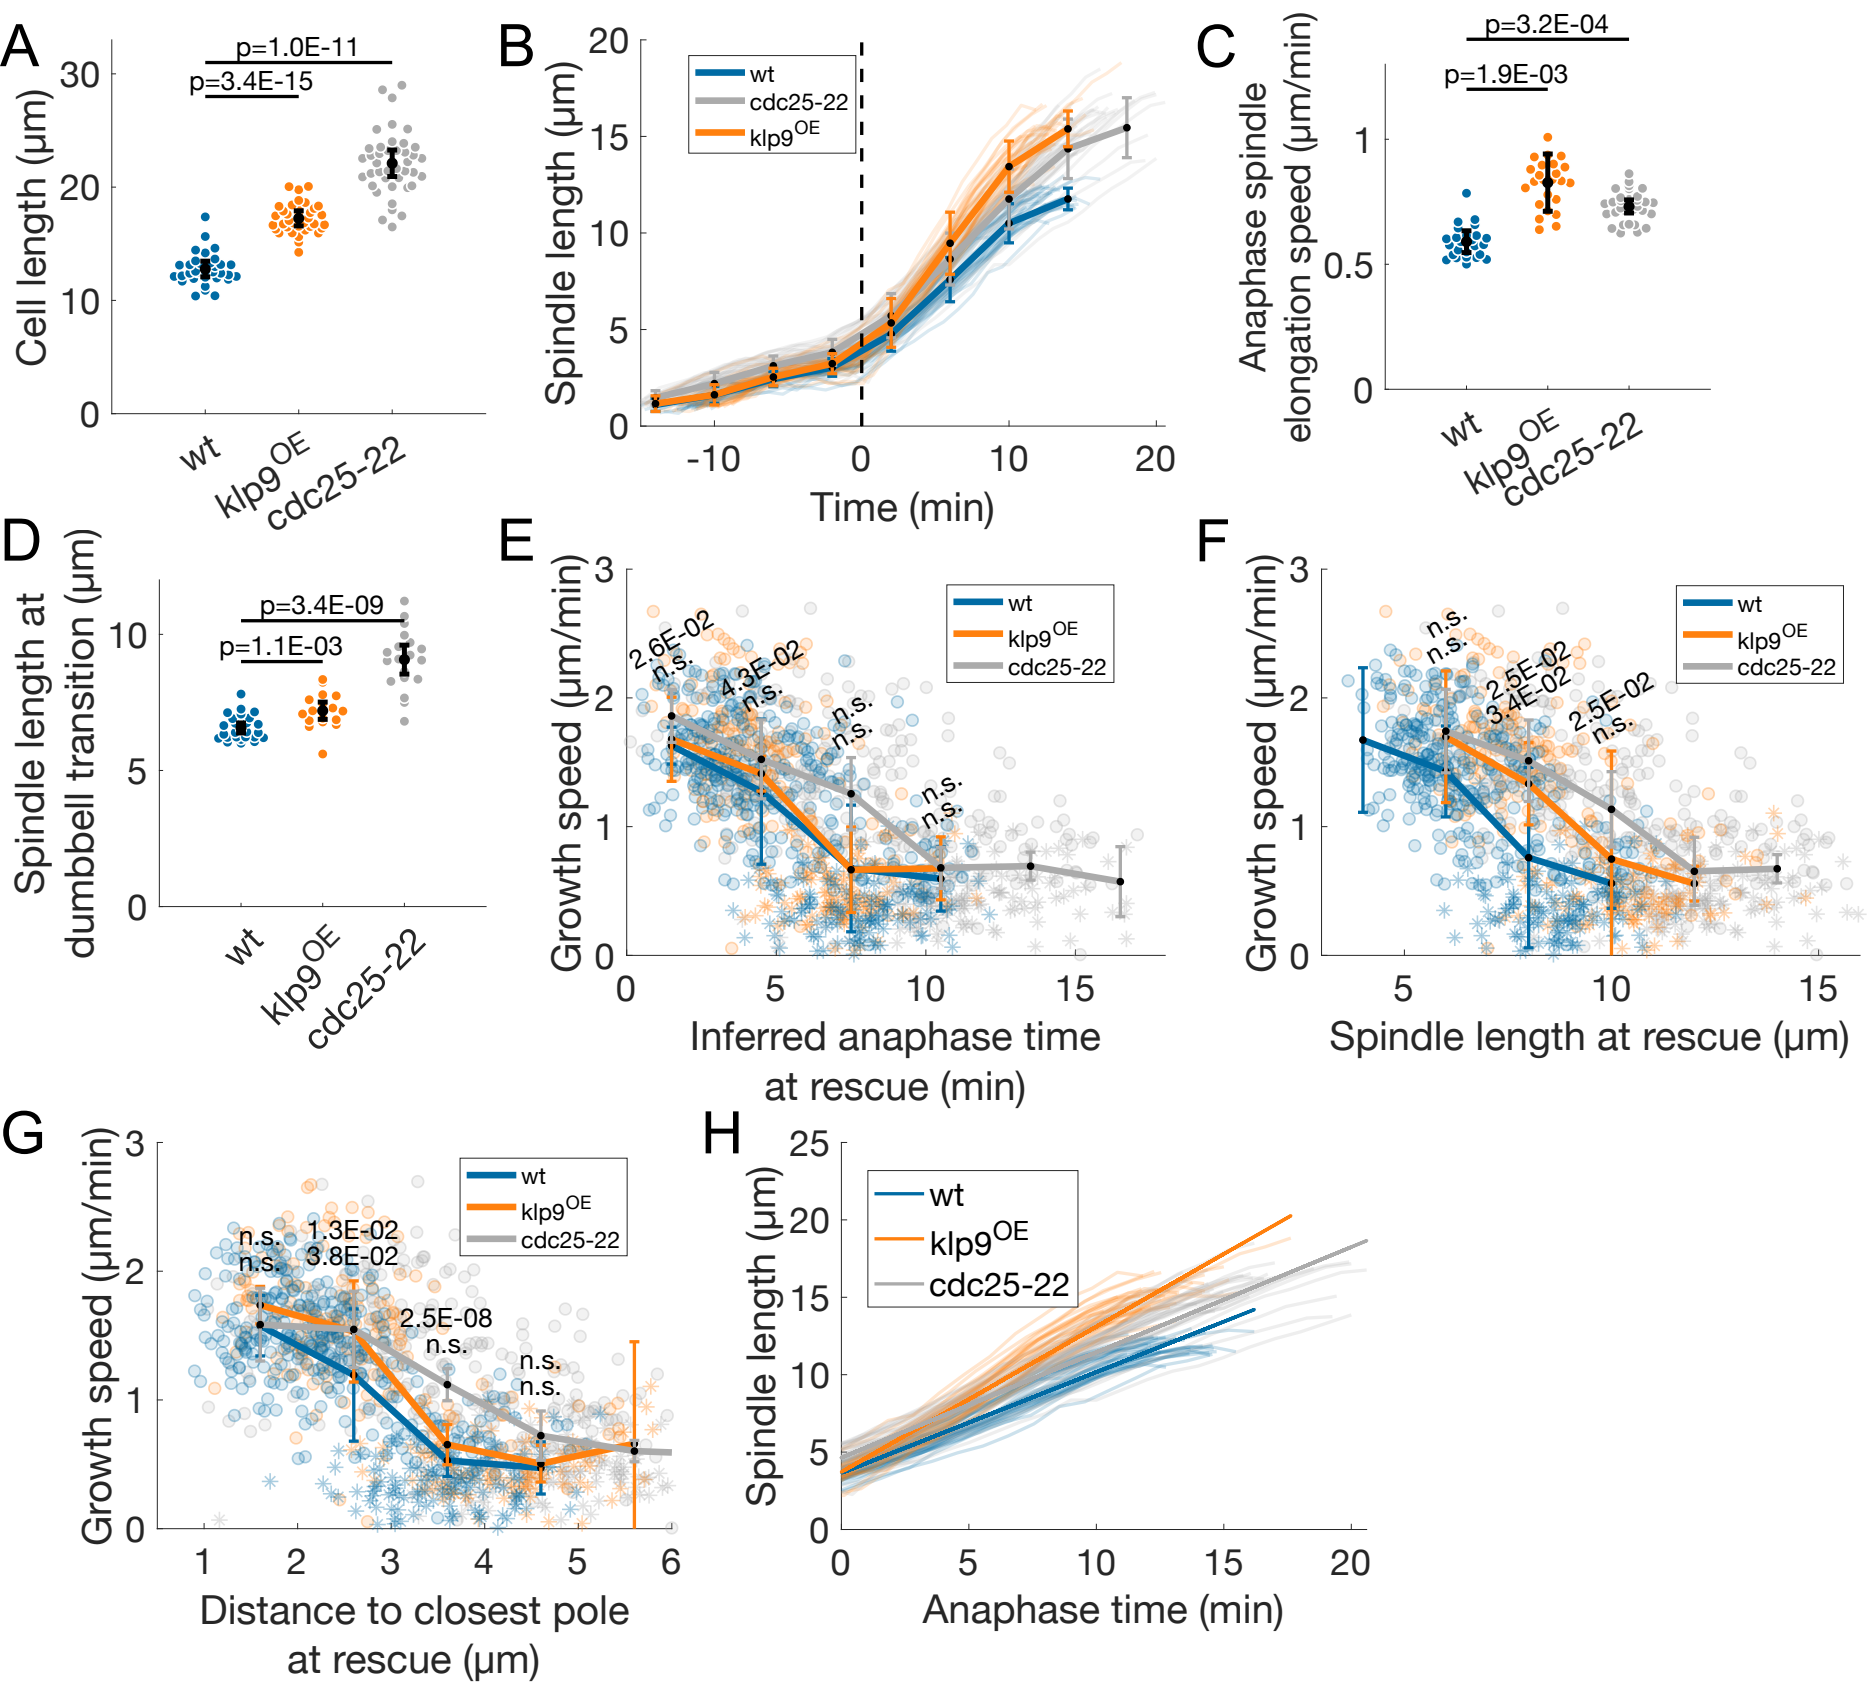

Supplement: supp [file elife-72630-supp-v1.zip]

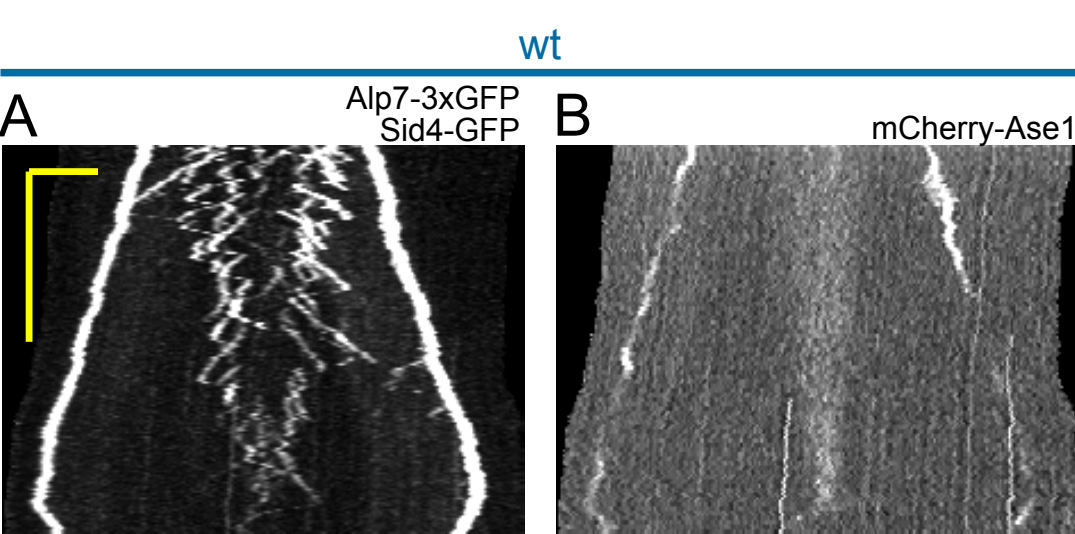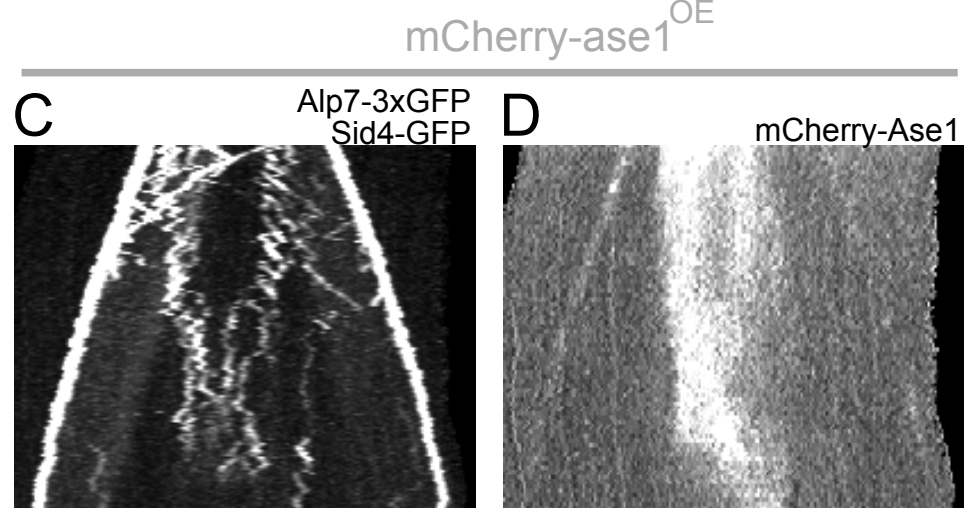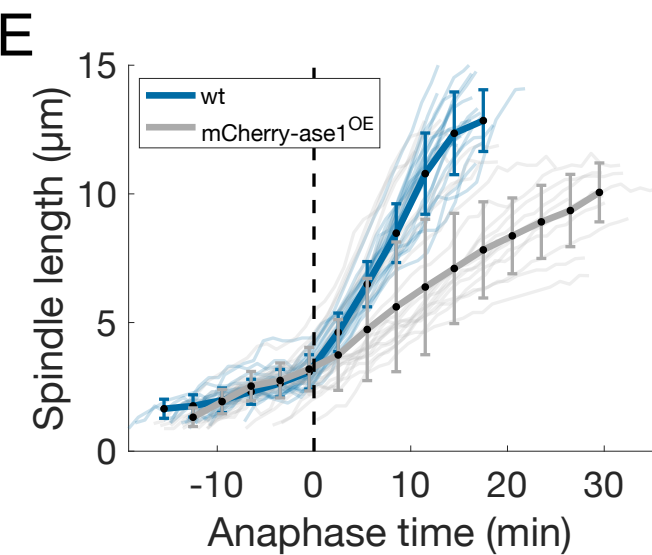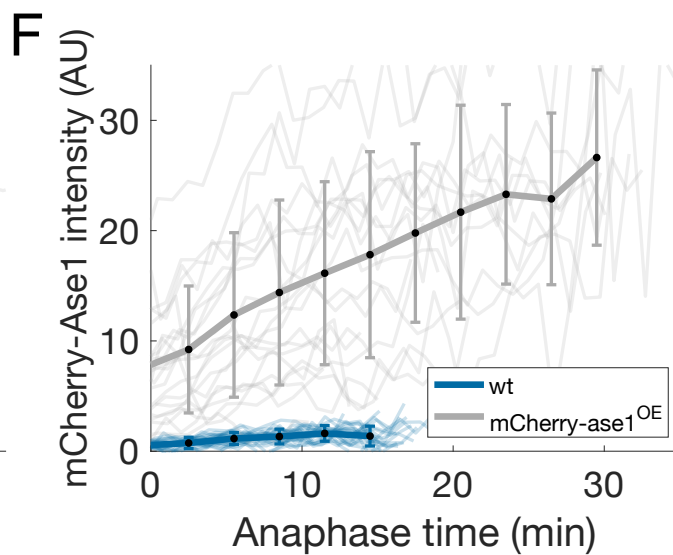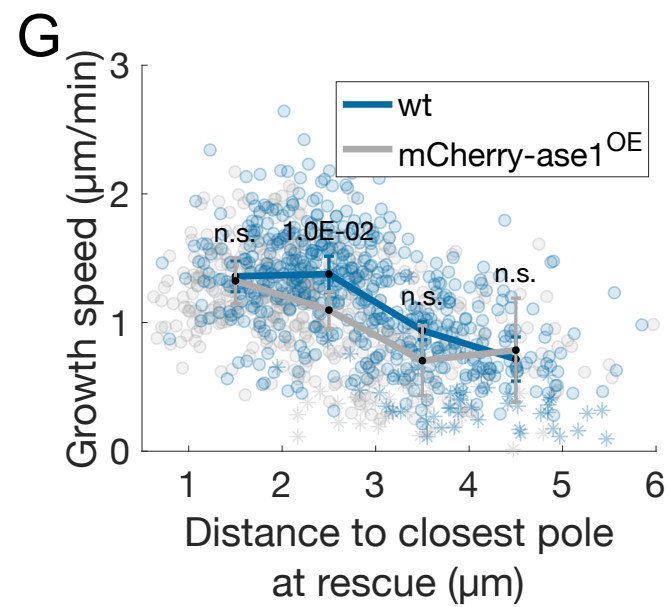

Supplement: supp [file elife-72630-supp-v1.zip]

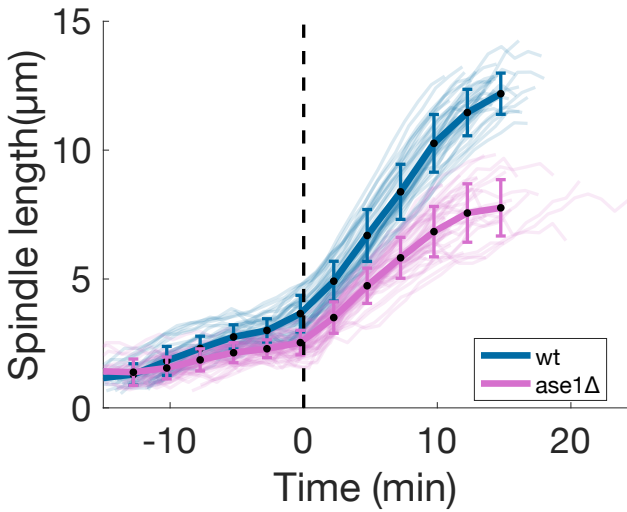

Supplement: supp [file elife-72630-supp-v1.zip]

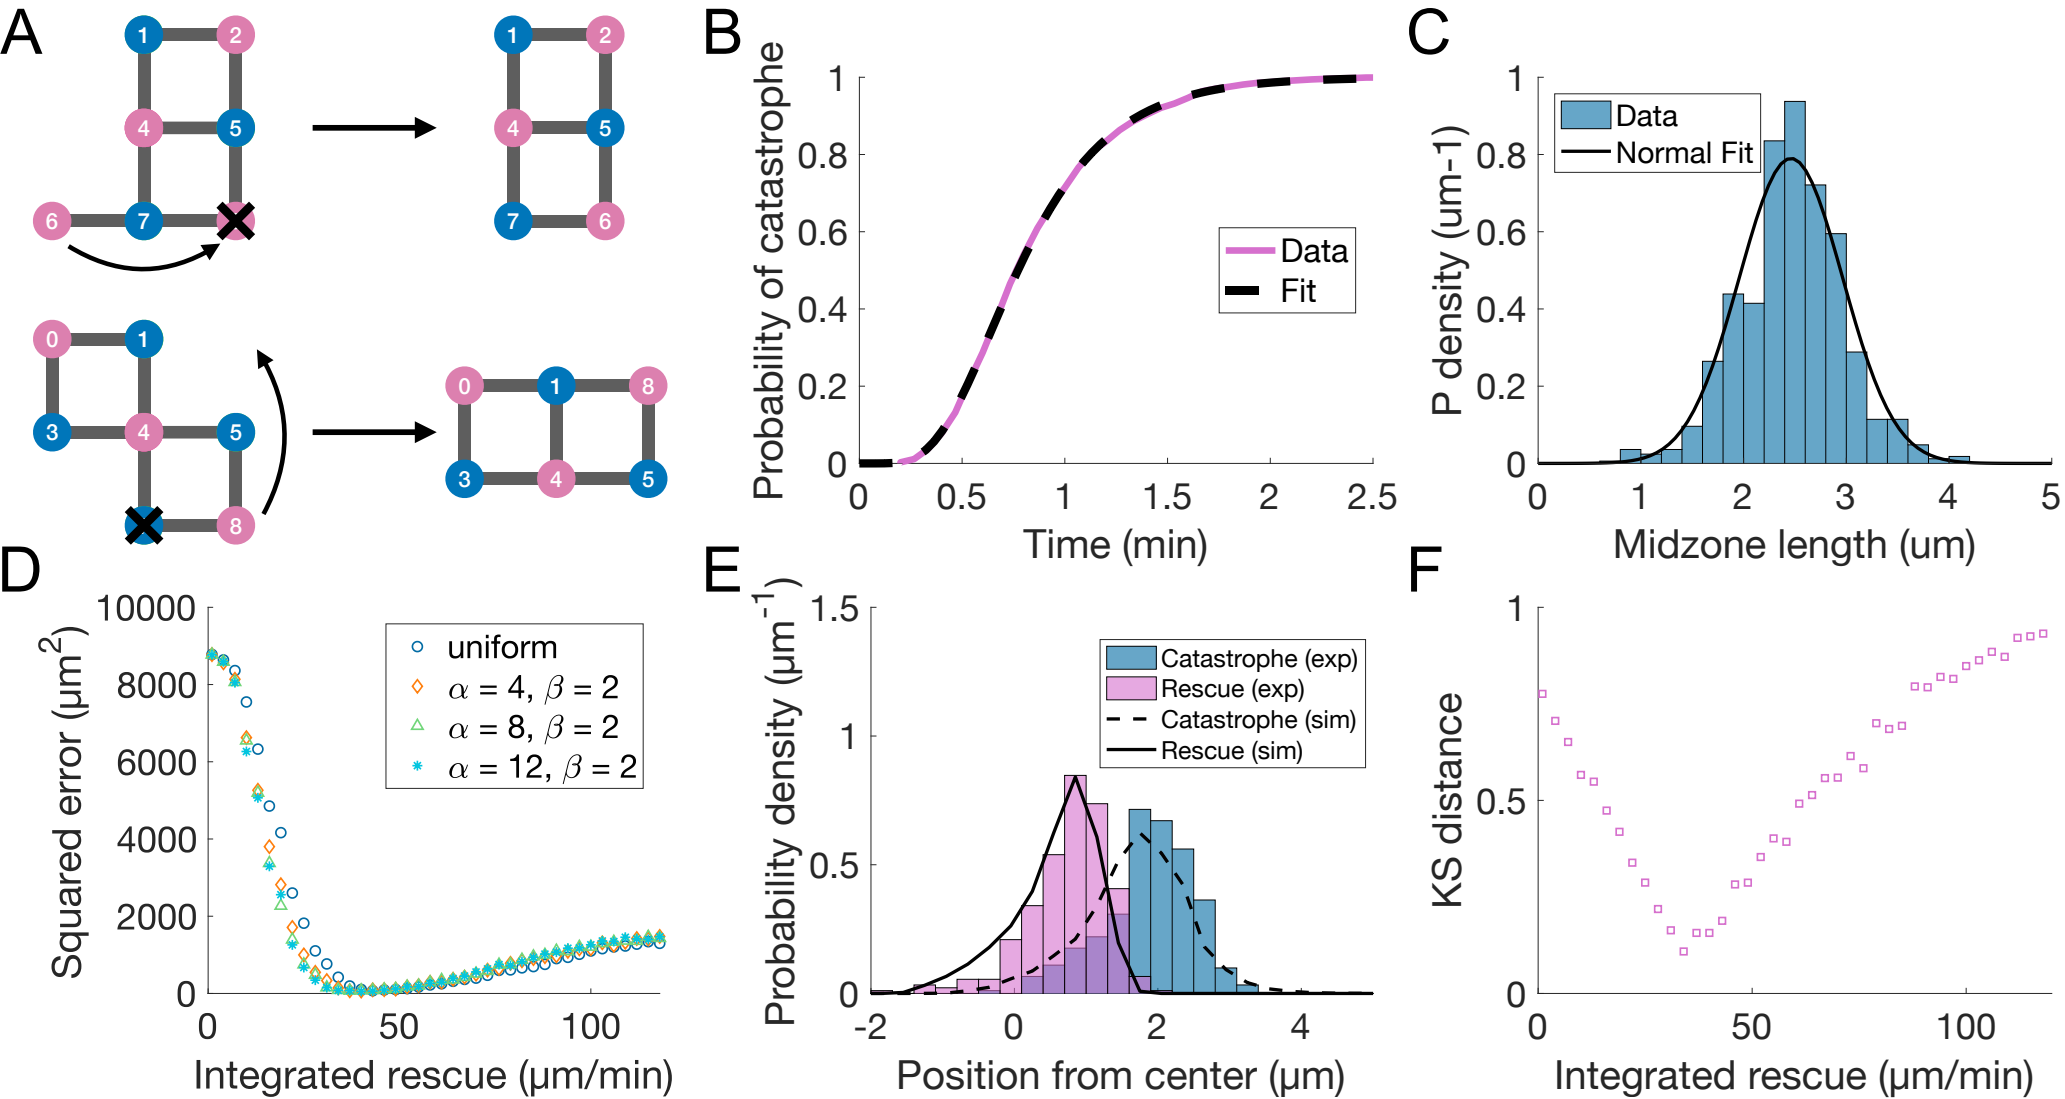

Supplement: supp [file elife-72630-supp-v1.zip]

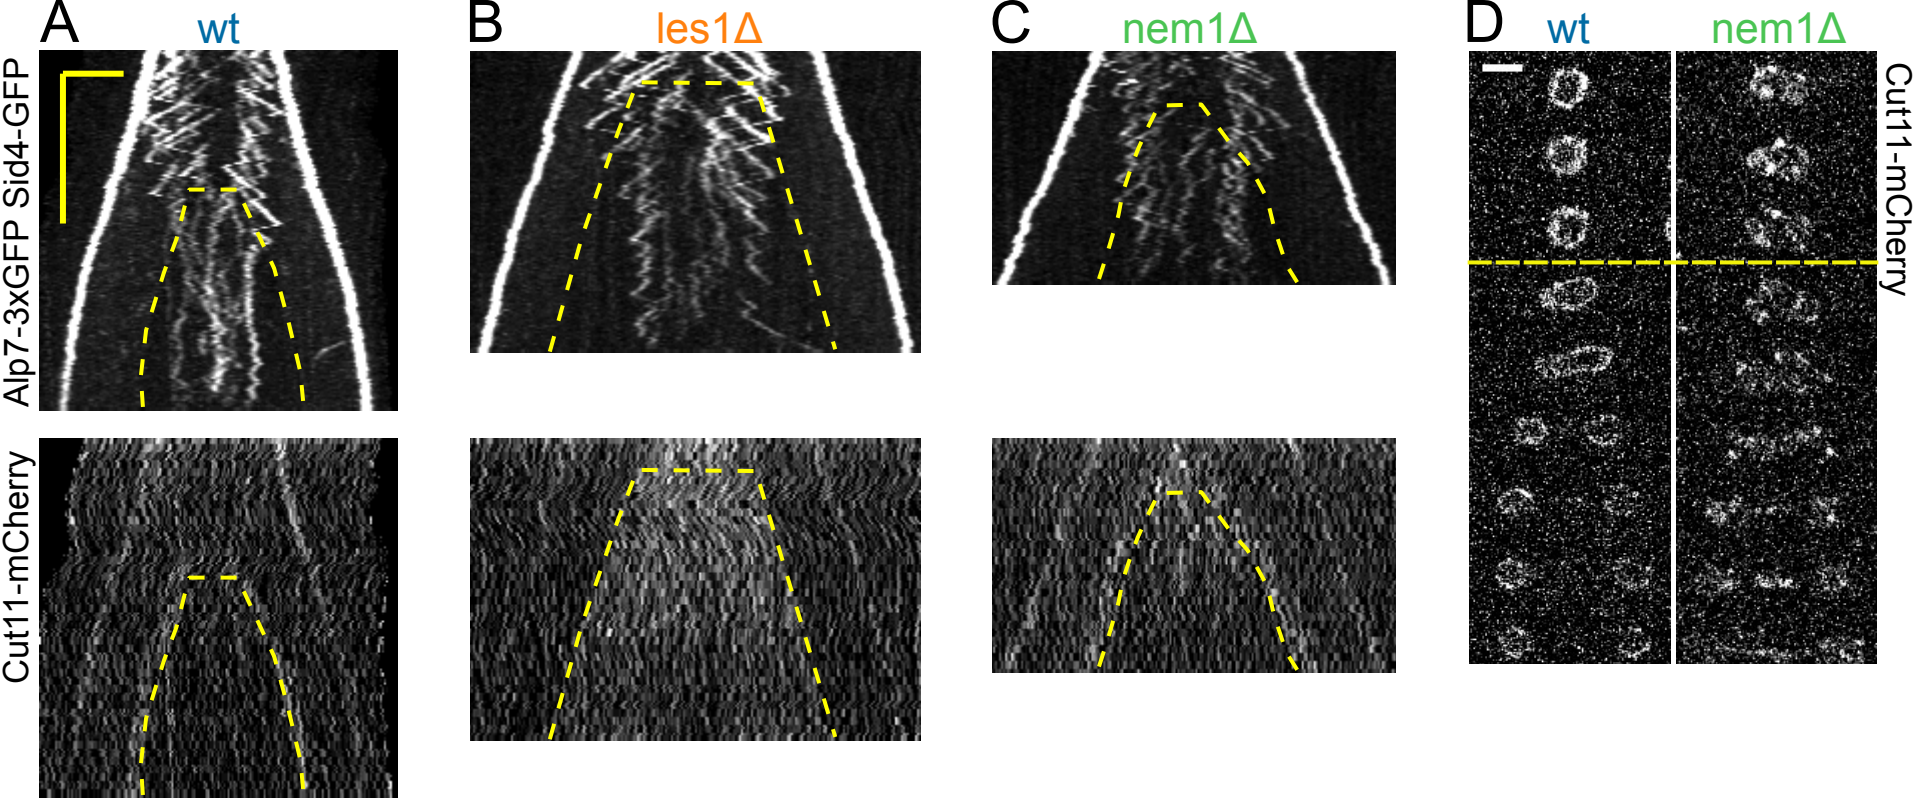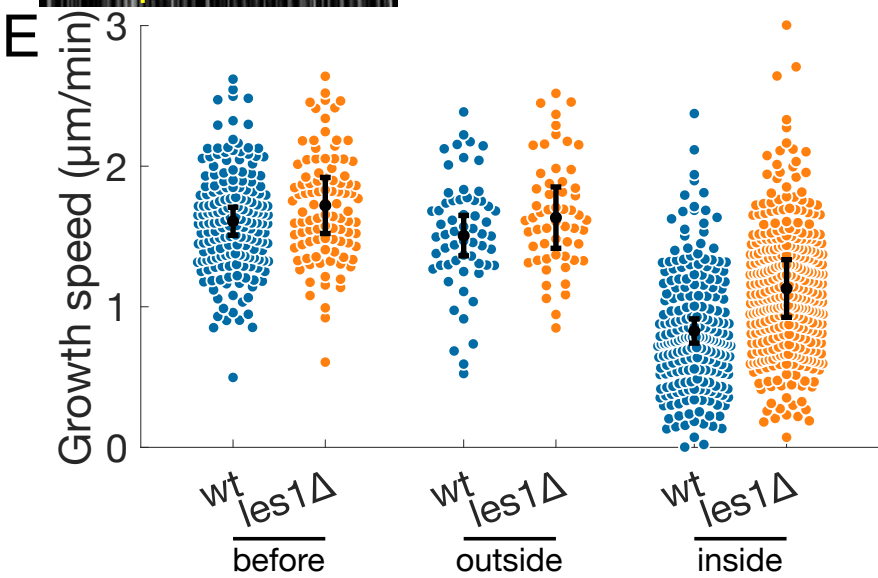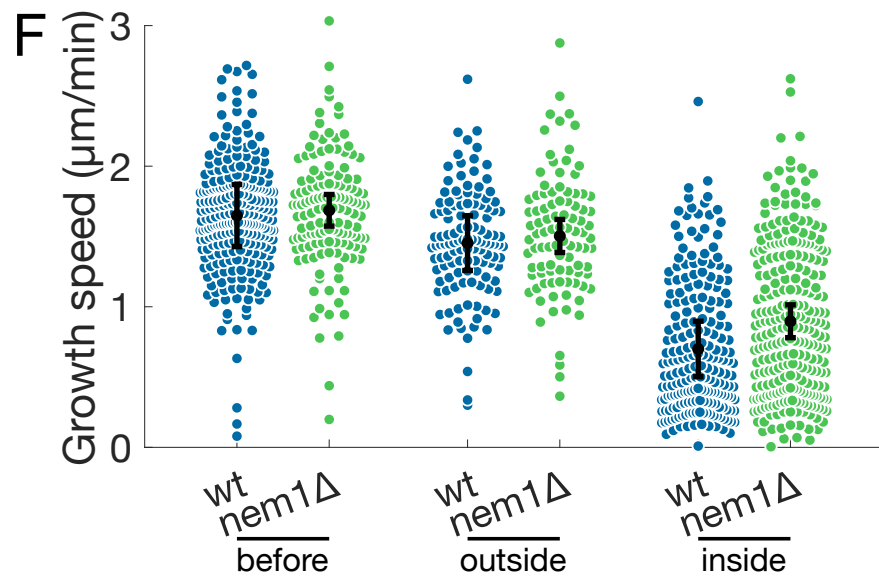

Supplement: supp [file elife-72630-supp-v1.zip]

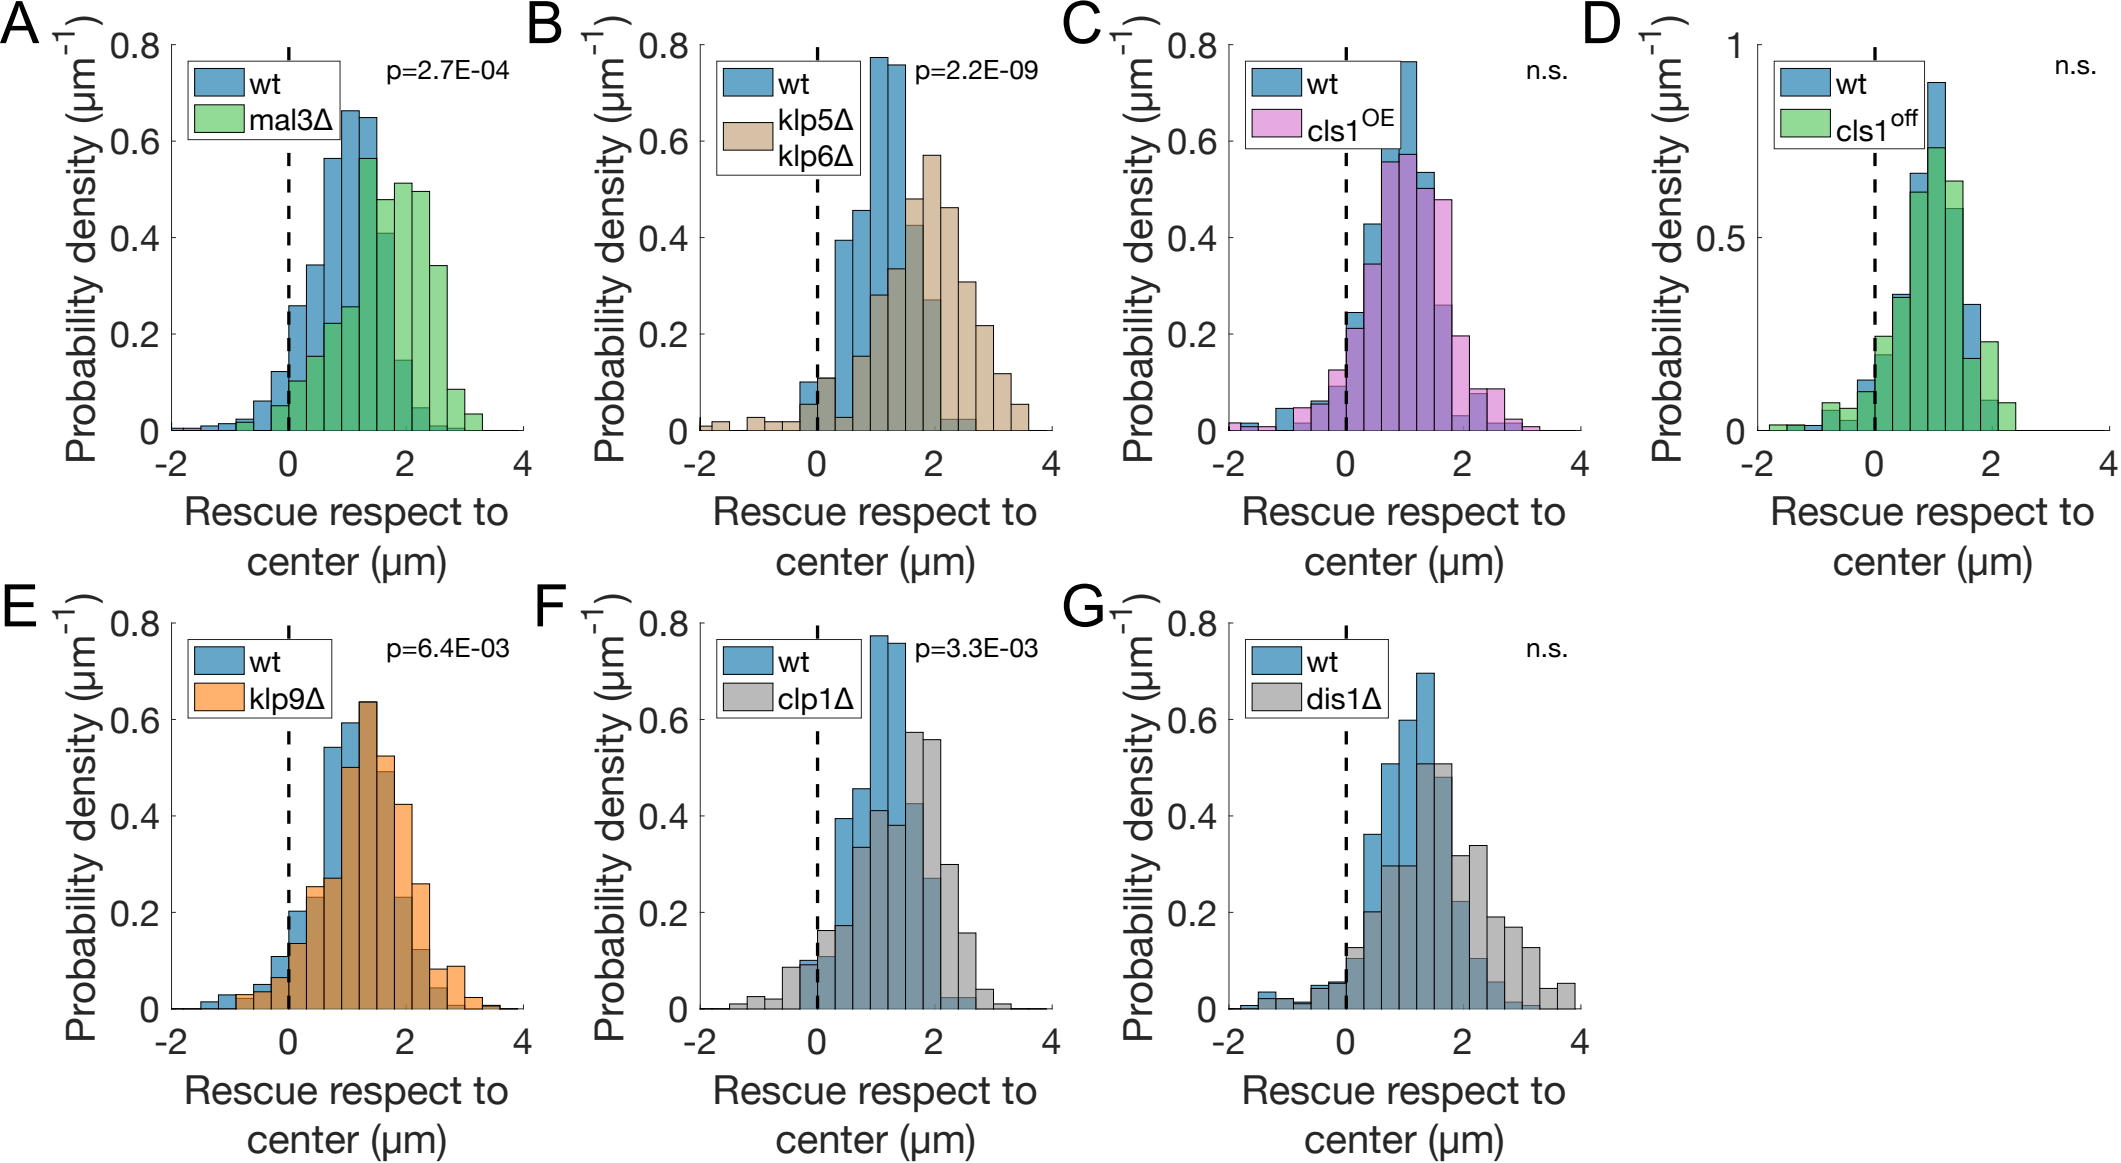

Supplement: supp [file elife-72630-supp-v1.zip]

**A**

anaphase

GFP-Mal3 Sid4-GFP

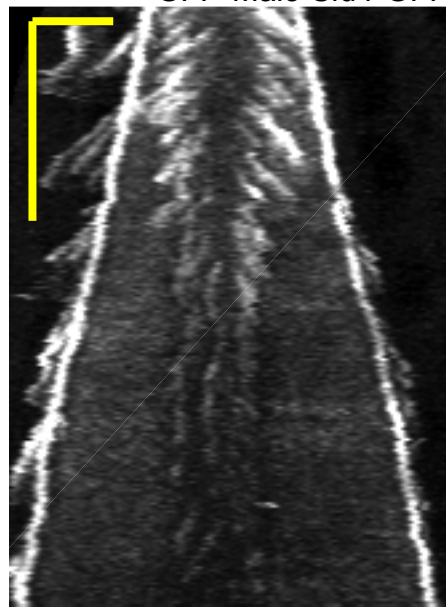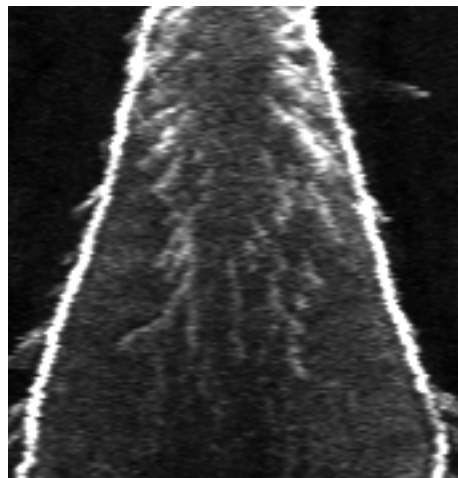**B**

interphase

GFP-Mal3 Sid4-GFP

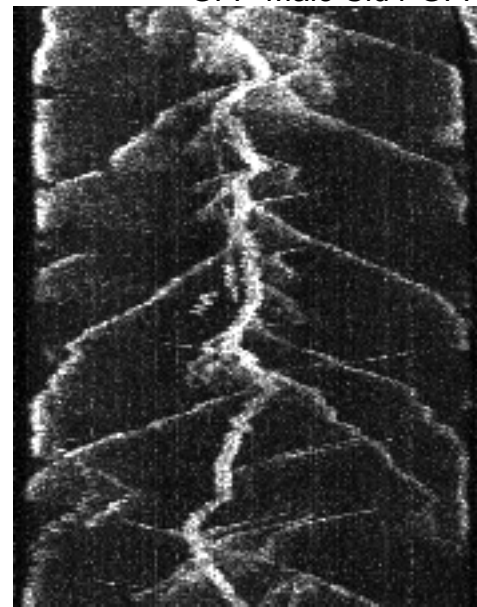**C**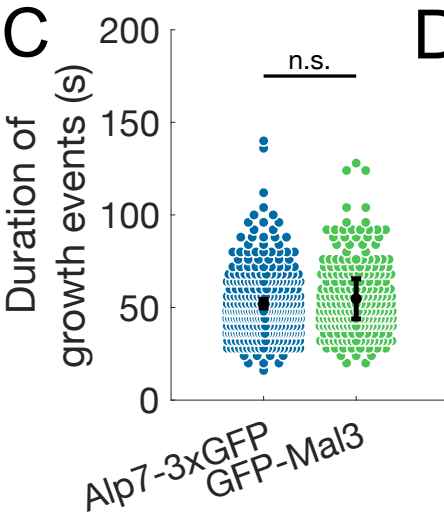**D**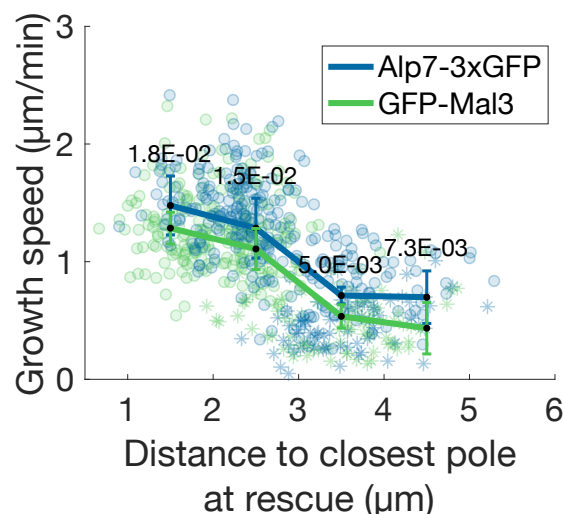**E**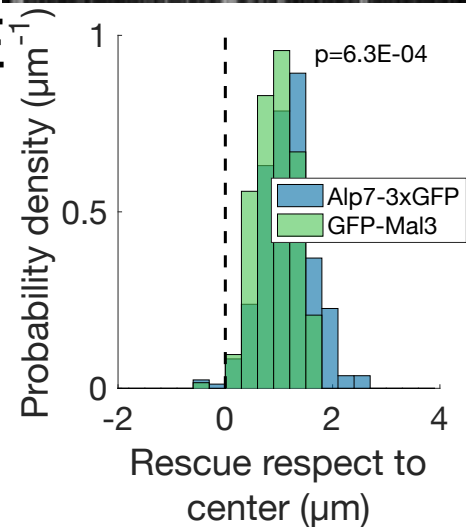**F**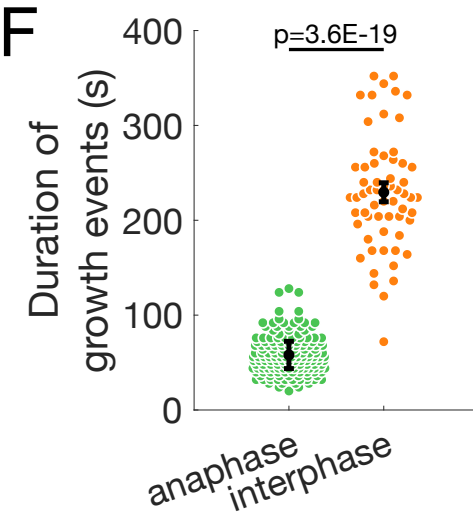**G**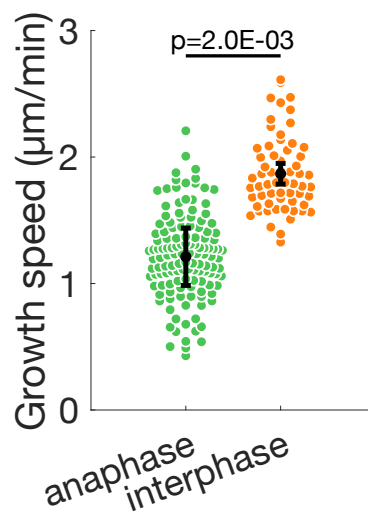

Supplement: supp [file elife-72630-supp-v1.zip]

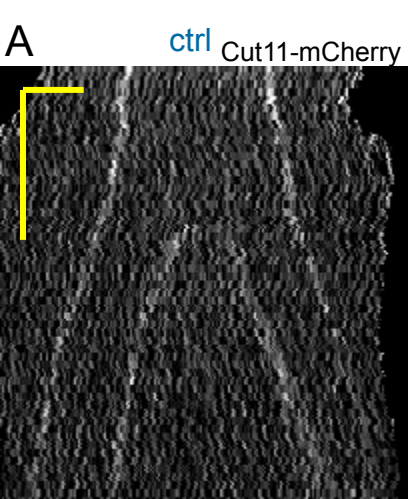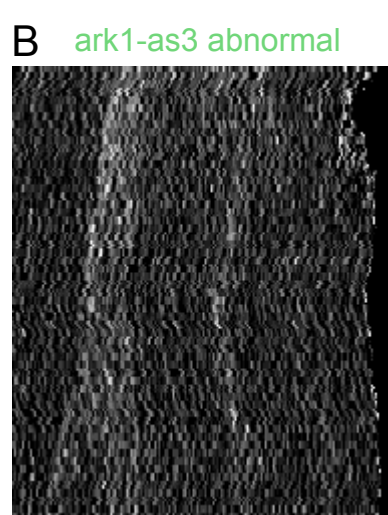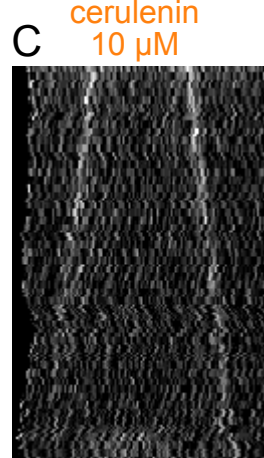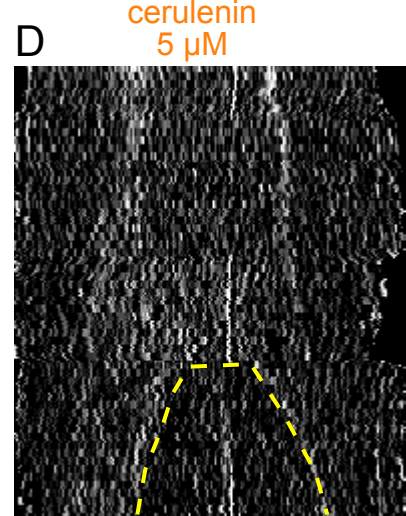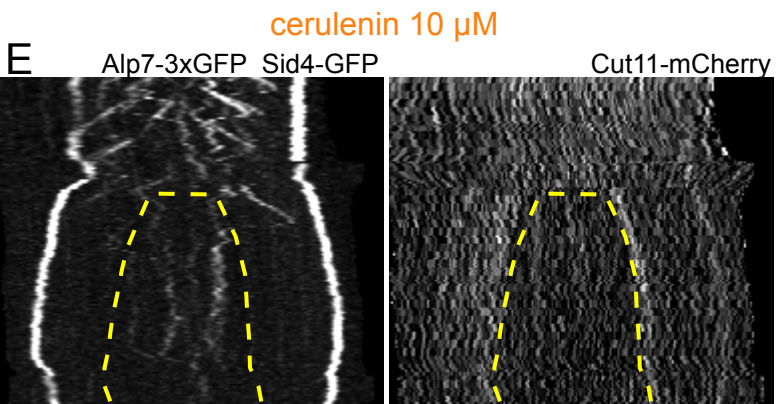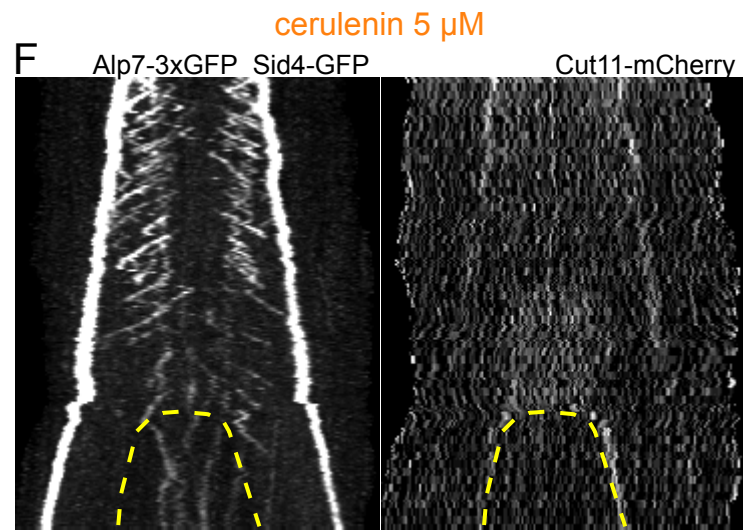

Supplement: supp [file elife-72630-supp-v1.zip]

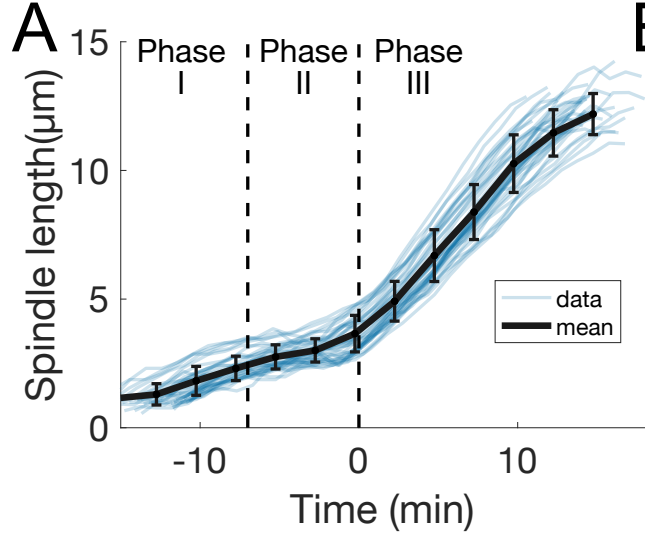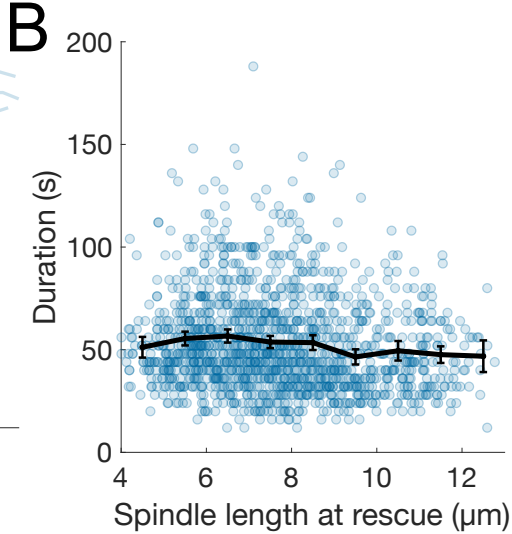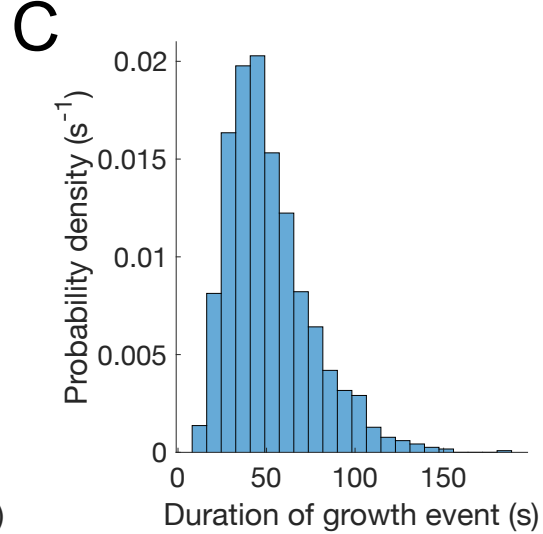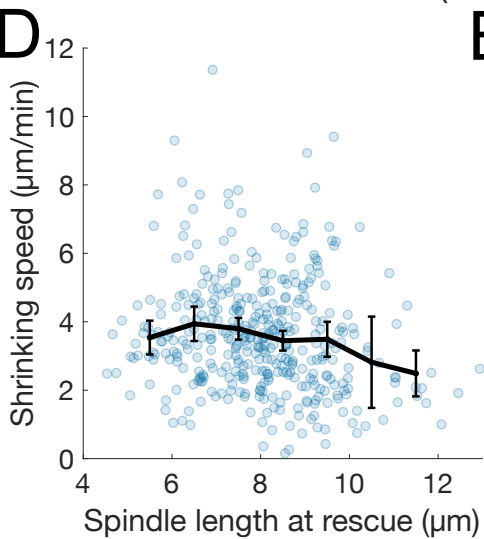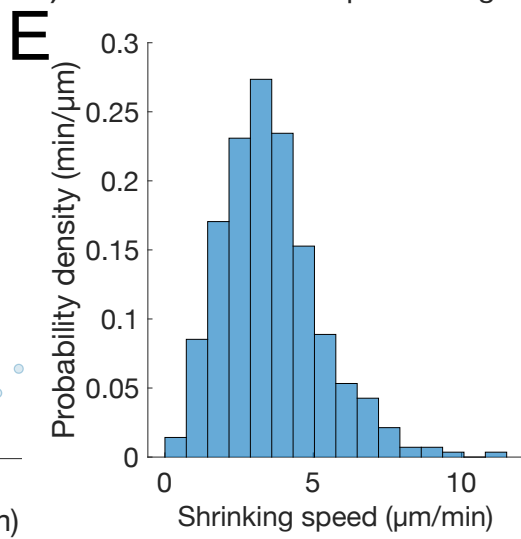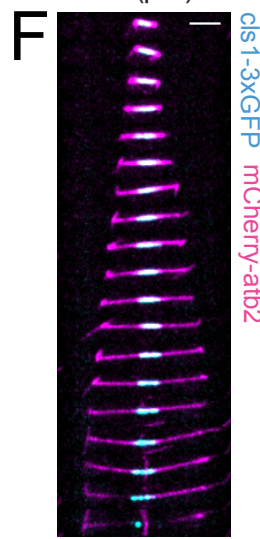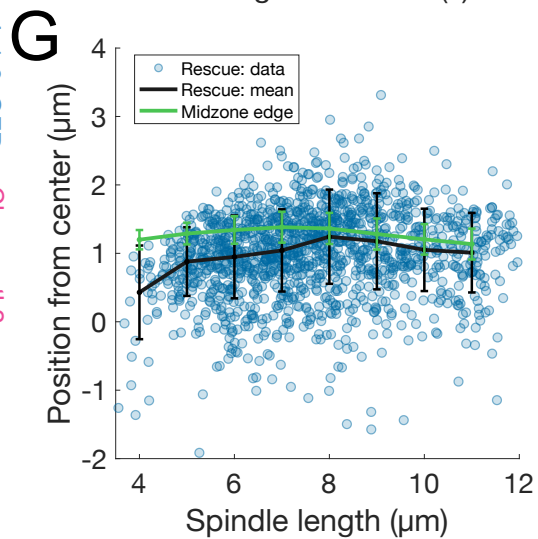

Supplement: supp [file elife-72630-supp-v1.zip]

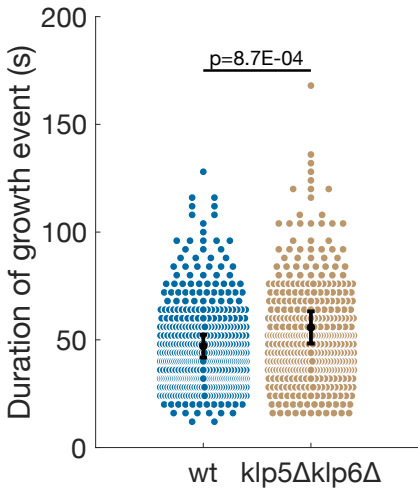

Supplement: supp [file elife-72630-supp-v1.zip]

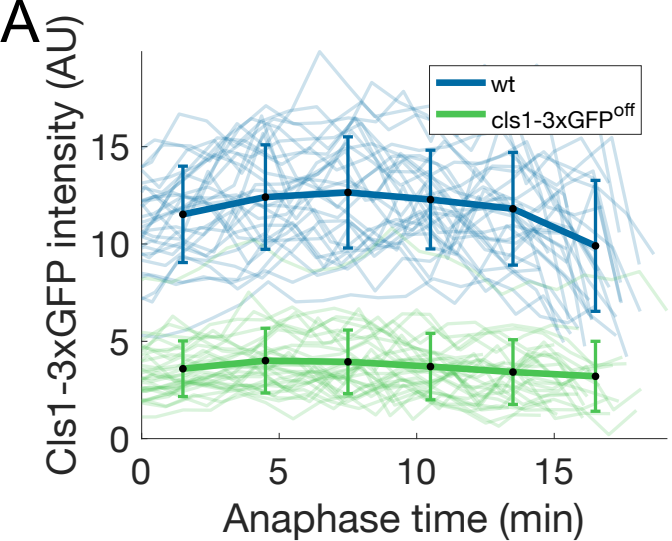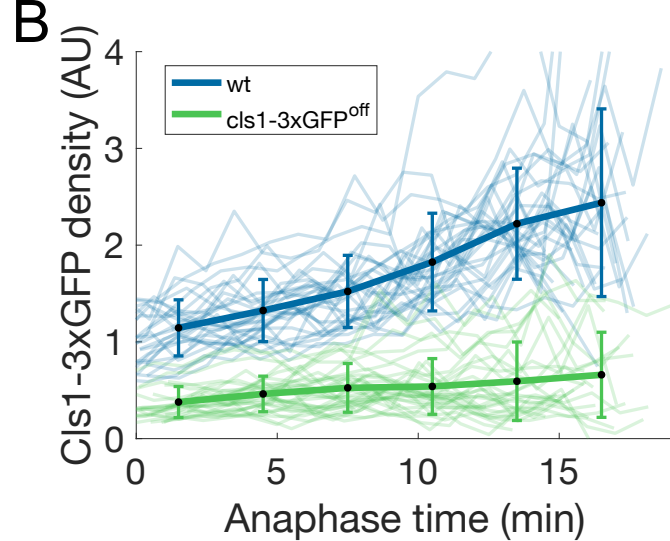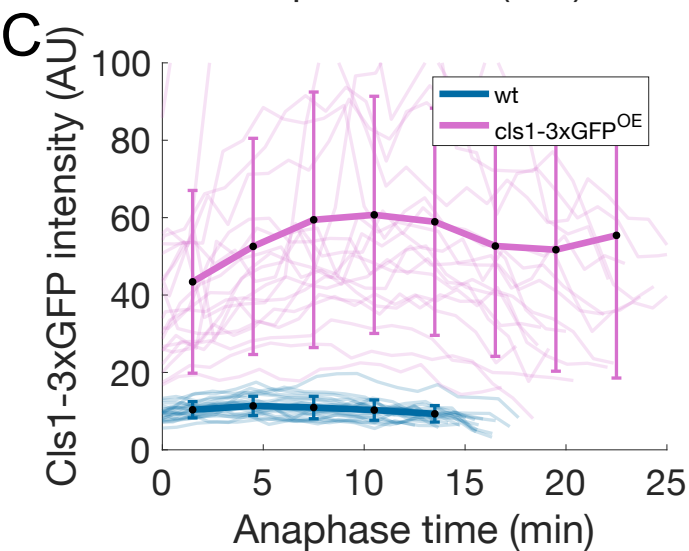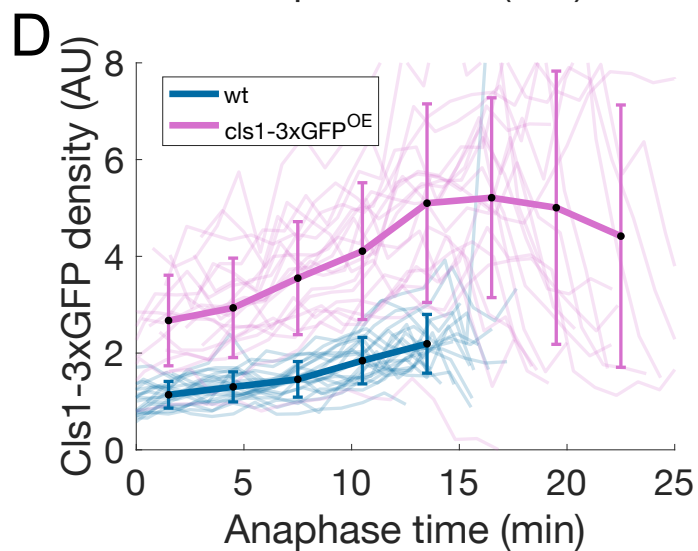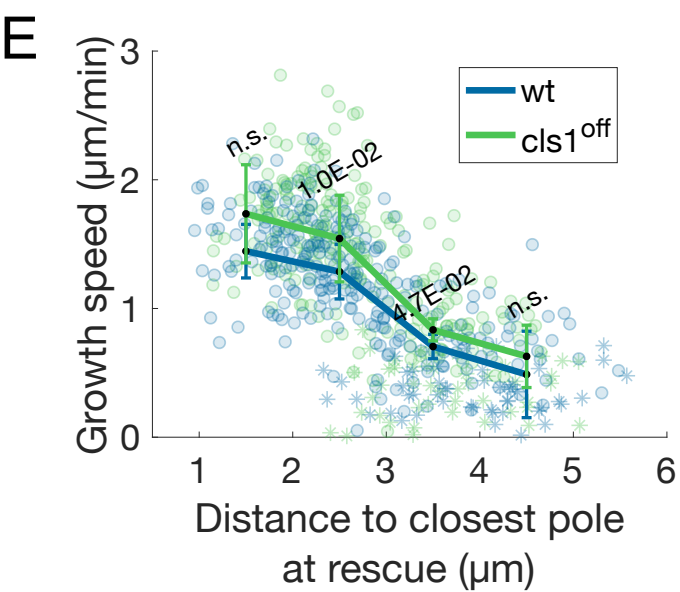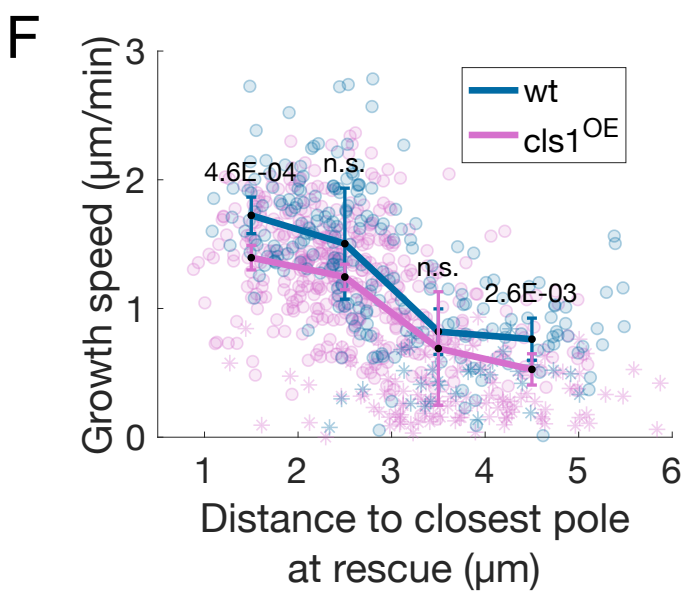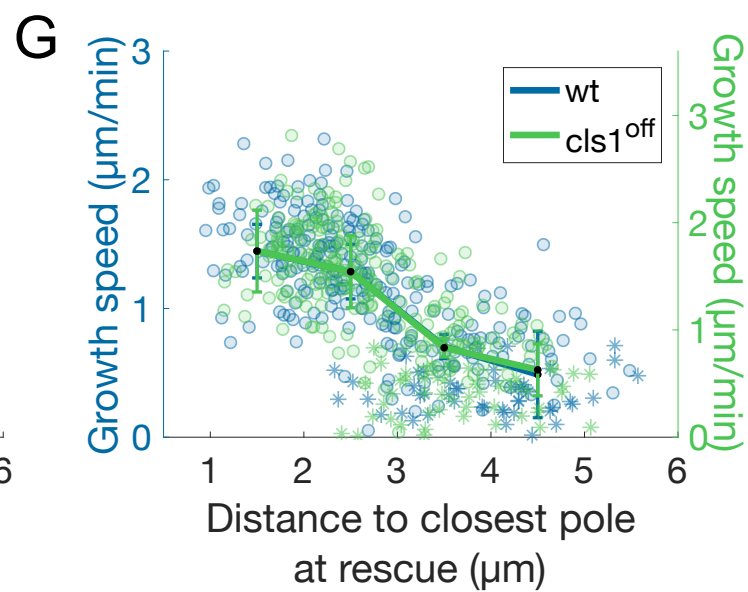

Supplement: supp [file elife-72630-supp-v1.zip]

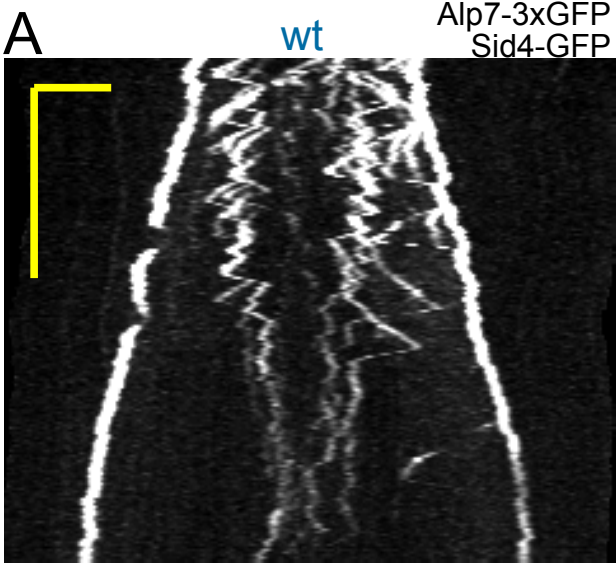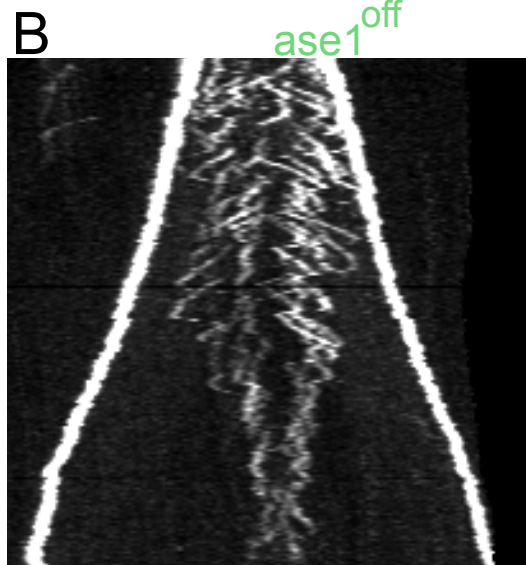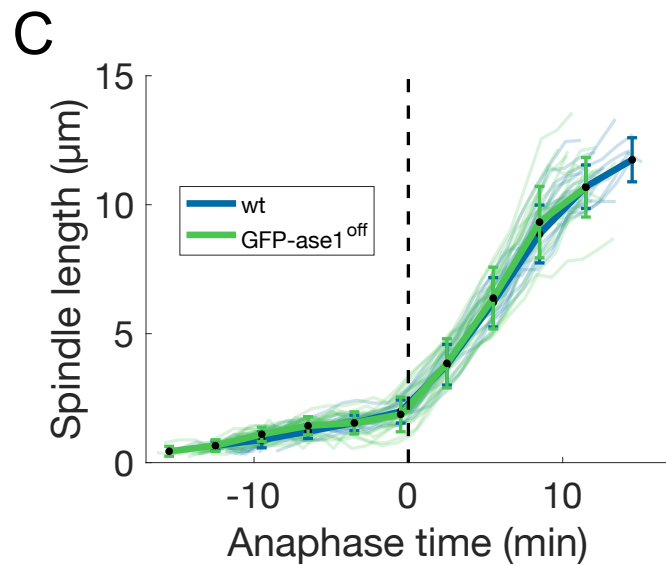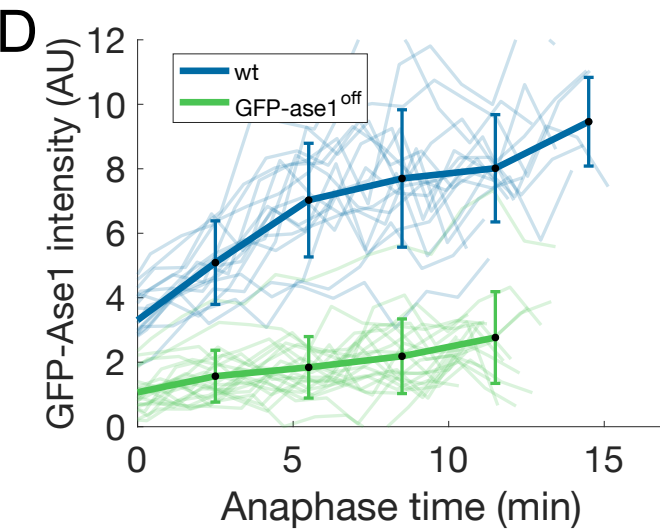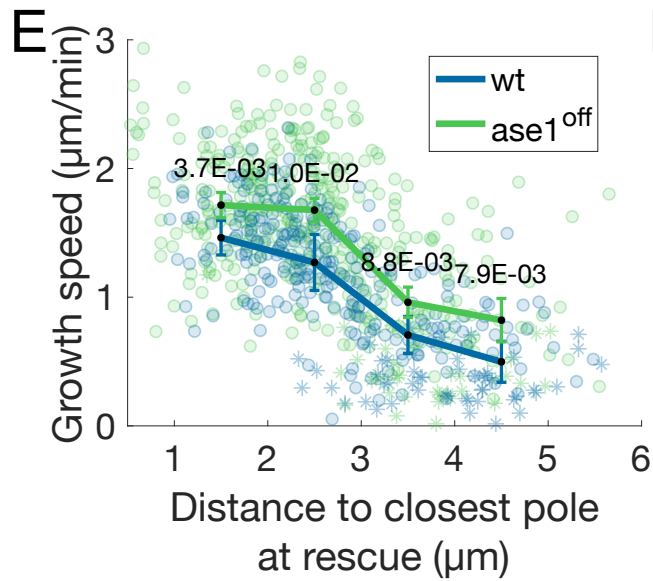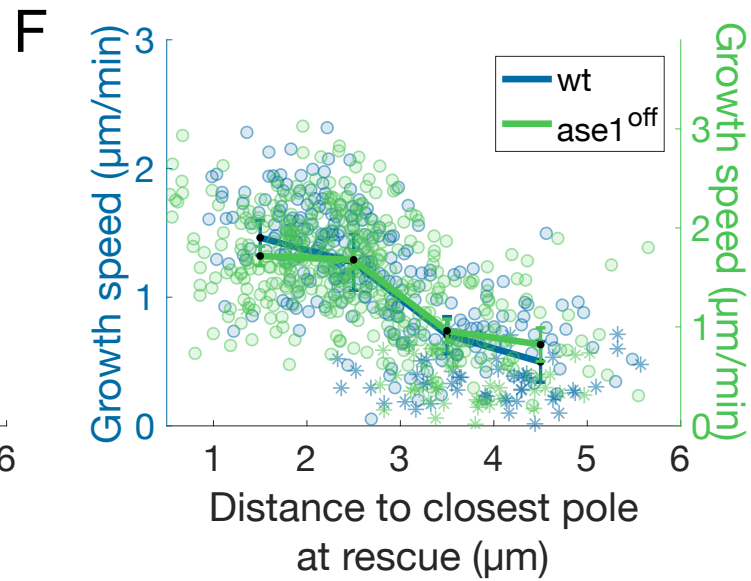

Supplement: supp [file elife-72630-supp-v1.zip]
